# Supplementary material for: Patterns of change in α and β taxonomic and phylogenetic diversity in the secondary succession of semi-natural grasslands in the Northern Apennines
Source: PeerJ. 2020 Mar 11;8:e8683. doi: 10.7717/peerj.8683 (PMC7071822; doi:10.7717/peerj.8683)
Supplement: Supplemental Information 3 — Sheet 1 “diversity data” includes information on habitat, succession stage, species richness and the phylogenetic alfa-diversity indexes used in the manuscript. Sheet 2 “community matrix” includes the species Presence/Absence data with plots in the rows and species in the columns. Species names matches those used in the phylogenetic tree in Newick format provided as Appendix S3 [file peerj-08-8683-s003.xlsx]

## Sheet: diversity data
REP	Habitat	Succession_Stage	Species richness	PD_ALL	NRI__ALL	NTI__ALL	PD_NO_JUNI	NRI__NO_JUNI	NTI__NO_JUNI
R_01	Hay_meadows	Managed	19	0.983291	0.705224	0.661379	0.987084	0.707824	0.65259
R_02	Hay_meadows	Managed	25	1.24951	0.809774	0.662894	1.19822	0.784321	0.610749
R_03	Hay_meadows	Managed	30	0.394772	0.593343	0.508618	0.412945	0.636771	0.536606
R_04	Hay_meadows	Managed	29	-0.985611	0.198056	-1.3742	-0.981857	0.243157	-1.39124
R_05	Hay_meadows	Managed	22	-0.574764	0.210668	-1.07145	-0.719583	0.107218	-1.24194
R_06	Hay_meadows	Managed	26	0.539252	0.66714	0.000765083	0.42482	0.616851	-0.121579
R_07	Hay_meadows	Managed	23	0.755218	0.613172	0.27293	0.743058	0.594383	0.229356
R_08	Hay_meadows	Managed	21	0.15453	0.176655	0.226335	0.189918	0.179492	0.258893
R_09	Hay_meadows	Abandoned	12	-0.283941	0.22533	-0.205988	-0.348674	0.156058	-0.263552
R_10	Hay_meadows	Abandoned	17	-0.271547	0.167228	-0.231025	-0.220127	0.18926	-0.193445
R_11	Hay_meadows	Abandoned	14	-1.11818	0.143639	-1.30093	-1.14405	0.123795	-1.30075
R_12	Hay_meadows	Abandoned	18	-1.28414	-0.242959	-1.25686	-1.29267	-0.192396	-1.26661
R_13	Hay_meadows	Abandoned	15	-0.956912	0.117373	-0.733103	-0.972594	0.103276	-0.747746
R_14	Hay_meadows	Abandoned	12	-1.58833	0.122094	-2.22408	-1.63022	0.057019	-2.24017
R_15	Hay_meadows	Abandoned	7	-1.34682	-0.546968	-1.51159	-1.46598	-0.689815	-1.57657
R_16	Hay_meadows	Abandoned	9	-0.871497	0.0650035	-1.11698	-0.827575	0.0727779	-1.04546
R_17	Hay_meadows	Abandoned	7	-1.39303	-0.241076	-1.81106	-1.4858	-0.304043	-1.8953
R_18	Hay_meadows	Managed	24	0.973562	0.681541	0.421561	0.960283	0.689964	0.407626
R_19	Hay_meadows	Abandoned	6	-1.23076	-0.268385	-1.6189	-1.4135	-0.449222	-1.79664
R_20	Hay_meadows	Managed	20	1.76913	1.01954	1.93279	1.72576	0.9777	1.92296
R_21	Dry_grasslands	Managed	27	1.02036	0.754748	0.951043	1.02452	0.769829	0.964038
R_22	Dry_grasslands	Managed	22	0.566878	0.649645	0.459936	0.508827	0.611604	0.414223
R_23	Dry_grasslands	Managed	21	0.19662	0.211794	0.149022	0.258154	0.244399	0.216695
R_24	Dry_grasslands	Managed	19	0.0528708	0.387841	0.0872878	0.0481473	0.385993	0.0726218
R_25	Dry_grasslands	Managed	26	0.750145	0.816658	0.656077	0.767034	0.80934	0.686151
R_26	Dry_grasslands	Managed	24	-0.157301	0.442139	-0.328545	-0.188117	0.455488	-0.366338
R_27	Dry_grasslands	Managed	26	0.662412	0.663793	0.566998	0.673572	0.67013	0.59653
R_28	Dry_grasslands	Managed	26	-0.646025	0.155307	-0.738794	-0.542979	0.297225	-0.651315
R_29	Dry_grasslands	Managed	27	-0.31599	0.386481	-0.356804	-0.372729	0.350019	-0.40484
R_30	Dry_grasslands	Managed	30	-0.14487	0.375223	-0.121709	-0.163297	0.362544	-0.163495
R_31	Hay_meadows	Transition	20	1.38495	1.27697	0.771352	1.41316	1.30604	0.779996
R_32	Hay_meadows	Transition	19	2.65307	2.40037	1.89747	2.48178	2.30623	1.772
R_33	Hay_meadows	Transition	18	1.02043	0.430949	1.57352	1.03696	0.436804	1.60957
R_34	Hay_meadows	Transition	19	1.67022	1.17521	1.10924	1.65046	1.13718	1.10067
R_35	Hay_meadows	Transition	23	0.539837	0.647678	0.780868	0.577498	0.676421	0.800546
R_36	Hay_meadows	Transition	25	1.03065	1.03792	0.55736	1.00295	1.0256	0.537222
R_37	Hay_meadows	Transition	23	2.38214	1.54472	1.7959	2.32188	1.51596	1.76571
R_38	Hay_meadows	Transition	20	1.38276	0.978135	0.894049	1.45714	1.00952	0.983661
R_39	Hay_meadows	Transition	20	0.680282	0.638527	0.319863	0.622872	0.580687	0.266143
R_40	Hay_meadows	Transition	20	0.511913	0.457479	0.178796	0.507239	0.48462	0.193447
R_41	Dry_grasslands	Transition	19	0.63267	0.352857	0.623802	0.661578	0.378014	0.646704
R_42	Dry_grasslands	Transition	11	-2.18615	-3.09546	-2.31937	0.275156	0.218469	-0.900672
R_43	Dry_grasslands	Transition	24	-0.276379	1.0034	-0.488356	-0.246522	1.01345	-0.468316
R_44	Dry_grasslands	Transition	21	1.12162	0.54869	1.6928	1.12879	0.549181	1.73369
R_45	Dry_grasslands	Abandoned	8	-1.88135	-3.9359	-0.817464	1.36659	0.110802	1.00699
R_46	Dry_grasslands	Transition	19	1.77023	1.38551	1.4078	1.79004	1.3951	1.4436
R_47	Dry_grasslands	Abandoned	11	-2.61853	-3.31395	-2.37002	-0.0264892	0.104987	-0.971405
R_48	Dry_grasslands	Transition	16	0.0908956	0.24705	0.0149596	0.0330044	0.219182	-0.0576745
R_49	Dry_grasslands	Transition	19	0.0826839	0.885698	-0.0282482	0.103923	0.896147	-0.0120722
R_50	Dry_grasslands	Abandoned	10	-2.19266	-3.38894	-2.04998	0.476088	0.0725881	-0.478898
R_51	Dry_grasslands	Transition	17	-0.157186	0.209448	-0.258328	-0.11219	0.246001	-0.209217
R_52	Dry_grasslands	Abandoned	14	2.19735	1.6752	1.66506	2.16324	1.64152	1.65515
R_53	Dry_grasslands	Transition	15	-0.291925	-0.101014	0.0432967	-0.33417	-0.108653	0.00661166
R_54	Dry_grasslands	Abandoned	5	-3.30354	-4.51839	-2.57815	0.65797	-0.297415	-0.951766
R_55	Dry_grasslands	Abandoned	9	-3.75833	-4.30476	-3.59715	-0.761255	-0.619657	-2.23232
R_56	Dry_grasslands	Abandoned	12	0.572537	0.149704	0.634729	0.550394	0.167907	0.584045
R_57	Dry_grasslands	Transition	24	0.58727	0.540768	1.10058	0.565987	0.490479	1.07585
R_58	Dry_grasslands	Abandoned	5	-0.839831	-0.448139	-0.914516	-0.851074	-0.494936	-0.91419
R_59	Dry_grasslands	Abandoned	7	-3.37192	-4.45184	-2.85277	0.209742	-0.316609	-1.18831
R_60	Dry_grasslands	Abandoned	10	-3.86005	-4.2559	-3.89878	-1.03699	-0.405481	-2.45669

## Sheet: community matrix
	acer_campestre	achillea_collina	clinopodium_alpinum	agrimonia_eupatoria	agrostis_castellana	allium_sphaerocephalon	allium_vineale	anacamptis_pyramidalis	angelica_sylvestris	anthemis_arvensis	anthoxanthum_odoratum	anthyllis_vulneraria	arabis_hirsuta	arenaria_serpyllifolia	arrhenatherum_elatius	astragalus_monspessulanus	brachypodium_rupestre	briza_media	bromus_erectus	bromus_hordeaceus	bunium_bulbocastanum	bupleurum_baldense	campanula_rapunculus	campanula_trachelium	carex_flacca	carex_hirta	carlina_acanthifolia	centaurea_jacea	centaurea_nigrescens	cerastium_brachypetalum	chaerophyllum_aureum	cichorium_intybus	cirsium_tenoreanum	clematis_vitalba	clinopodium_vulgare	colchicum_lusitanicum	convolvulus_arvensis	crataegus_monogyna	crepis_vesicaria	cruciata_glabra	cuscuta_epithymum	cynosurus_cristatus	cynosurus_echinatus	dactylis_glomerata	daucus_carota	daphne_laureola	dorycnium_herbaceum	elymus_repens	erophila_verna
R_01	0	0	0	0	0	0	0	0	0	0	0	0	0	0	0	0	0	0	0	1	1	0	0	0	0	0	0	0	0	0	0	0	0	0	0	0	0	0	1	0	0	0	1	1	0	0	0	0	0
R_02	0	0	0	0	0	1	0	0	0	1	0	0	0	0	1	0	0	0	0	1	0	0	0	0	0	0	0	0	0	0	0	0	0	0	0	0	0	0	1	0	0	1	0	1	1	0	0	0	0
R_03	0	0	0	0	0	0	0	0	0	0	0	0	0	0	0	0	0	0	0	0	1	0	1	0	0	0	0	0	1	0	0	0	0	0	0	0	1	0	1	0	1	1	0	1	0	0	0	0	0
R_04	0	0	0	0	0	0	0	0	0	0	1	0	0	0	0	0	0	0	0	1	1	0	1	0	0	0	0	0	1	0	0	0	0	0	0	0	0	0	0	0	0	1	0	0	0	0	0	0	1
R_05	0	0	0	0	0	0	0	0	0	0	0	0	0	0	1	0	0	0	0	0	0	0	0	0	0	0	0	0	0	0	1	0	0	0	0	0	1	0	0	0	0	1	0	1	0	0	0	0	0
R_06	0	0	0	0	0	0	0	0	0	0	1	0	0	0	1	0	0	0	0	0	1	0	1	0	0	0	0	0	1	0	0	0	0	0	0	0	1	0	1	0	0	1	0	1	0	0	0	0	0
R_07	0	0	0	0	0	0	0	0	0	0	0	0	0	0	1	0	0	0	0	1	0	0	0	0	0	0	0	0	1	0	1	0	0	0	0	0	1	0	1	0	0	1	0	1	0	0	0	0	0
R_08	0	0	0	0	0	0	0	0	0	0	0	0	0	0	1	0	0	0	0	0	0	0	1	0	0	0	0	0	0	0	0	0	0	0	0	0	1	0	1	0	0	0	0	1	0	0	0	0	0
R_09	0	0	0	0	0	0	0	0	0	0	0	0	0	0	0	0	0	0	0	0	0	0	0	0	0	0	0	1	0	0	0	0	0	0	0	0	0	0	0	1	0	0	0	1	0	0	0	0	0
R_10	0	0	0	1	0	0	0	0	0	0	0	0	0	0	0	0	0	0	0	0	0	0	0	0	0	0	0	0	0	0	0	0	0	0	0	1	0	1	0	0	0	0	0	1	0	0	0	0	0
R_11	1	0	0	1	0	0	0	0	0	0	0	0	0	0	0	0	0	0	0	0	1	0	0	0	0	0	0	0	0	0	0	0	0	0	0	1	0	1	0	1	0	0	0	1	0	0	0	0	0
R_12	0	0	0	0	0	0	0	0	0	0	0	0	0	0	0	0	1	0	0	0	0	0	0	0	0	1	0	0	0	0	0	0	1	0	0	0	1	1	0	1	0	1	0	0	0	0	0	0	0
R_13	0	0	0	0	0	0	0	0	0	0	0	0	0	0	0	0	0	0	0	0	1	0	0	0	0	0	0	1	0	0	0	0	0	0	0	0	0	1	0	1	0	0	0	1	0	0	0	0	0
R_14	1	0	0	0	0	0	0	0	0	0	0	0	0	0	0	0	1	0	0	0	0	0	0	0	0	0	0	0	1	0	1	0	0	0	0	0	0	0	0	1	0	0	0	0	0	0	0	0	0
R_15	1	0	0	0	0	0	0	0	0	0	0	0	0	0	0	0	0	0	0	0	0	0	0	0	0	0	0	0	0	0	0	0	0	0	0	1	0	0	0	0	0	0	0	1	0	0	0	0	0
R_16	1	0	0	0	0	0	0	0	0	0	0	0	0	0	0	0	0	0	0	0	0	0	0	0	0	0	0	0	0	0	0	0	0	0	0	0	0	1	0	0	0	0	0	0	0	0	0	0	0
R_17	1	0	0	0	0	0	0	0	0	0	0	0	0	0	0	0	0	0	0	0	0	0	0	0	0	0	0	0	0	0	0	0	0	0	0	0	0	1	0	0	0	0	0	0	0	0	0	0	0
R_18	0	1	0	0	0	1	0	0	0	0	1	0	0	0	0	0	0	0	0	1	0	0	0	0	0	0	0	1	0	0	0	0	1	0	0	0	1	0	0	0	0	1	0	1	0	0	0	0	0
R_19	1	0	0	0	0	0	0	0	0	0	0	0	0	0	0	0	0	0	0	0	0	0	0	0	0	0	0	0	0	0	0	0	0	0	0	0	0	0	0	0	0	0	0	0	0	0	0	0	0
R_20	0	0	0	0	1	0	0	0	0	0	1	0	0	0	0	0	0	0	0	0	0	0	0	0	1	0	0	1	0	0	0	1	0	0	0	0	0	0	0	0	0	0	0	1	1	0	0	0	0
R_21	0	1	1	0	0	0	0	0	0	0	0	0	0	0	0	0	0	0	1	0	0	0	1	0	0	0	0	1	0	0	0	0	0	0	0	0	0	0	0	0	1	1	0	1	0	0	0	0	0
R_22	0	1	1	0	0	0	0	0	0	0	0	0	0	0	0	0	0	0	1	0	0	1	1	0	0	0	0	1	0	0	0	0	0	0	0	0	0	0	0	0	0	0	0	0	0	0	0	0	0
R_23	0	0	0	0	0	0	0	0	0	0	0	0	0	0	0	0	0	0	1	0	0	0	0	0	1	0	0	1	0	0	0	0	0	0	0	1	0	0	0	0	0	0	1	0	1	0	0	0	0
R_24	0	1	0	0	0	0	0	0	0	0	0	0	0	0	0	0	0	0	1	0	0	1	0	0	0	0	0	1	0	1	0	0	0	0	0	0	0	0	0	0	0	0	0	0	0	0	0	0	0
R_25	0	1	1	0	0	0	0	0	0	0	0	0	0	0	0	0	0	0	1	0	0	0	0	0	1	0	0	1	1	0	0	0	0	0	0	0	0	0	0	0	0	0	0	1	0	0	0	0	1
R_26	0	1	0	0	0	0	0	0	0	0	1	0	0	0	0	0	0	0	1	0	1	1	1	0	0	0	0	1	0	0	0	0	0	0	0	0	0	0	0	0	0	0	0	0	0	0	0	0	0
R_27	0	1	1	0	0	0	0	0	0	0	0	1	1	1	0	0	0	0	1	0	0	0	0	0	1	0	0	1	1	0	0	0	0	0	0	0	0	0	0	0	1	0	0	1	0	0	0	0	0
R_28	0	0	0	0	0	0	0	0	0	0	0	0	0	1	0	1	0	1	1	0	1	1	1	0	0	0	0	0	0	1	0	0	0	0	0	0	0	0	0	0	0	0	0	1	0	0	0	0	0
R_29	0	1	0	0	0	0	0	0	0	0	0	0	0	0	0	0	1	1	1	0	1	0	0	0	0	0	1	1	1	0	0	0	0	0	1	0	0	1	0	0	0	0	0	0	0	0	0	0	0
R_30	0	1	0	0	0	0	0	0	0	0	1	0	0	0	0	0	0	1	1	0	1	0	1	0	0	0	0	1	0	1	0	0	0	0	0	0	0	0	0	0	0	1	0	0	0	0	0	0	0
R_31	0	1	0	0	1	1	0	0	0	0	0	0	0	0	1	0	0	0	0	0	0	0	0	0	0	0	0	0	1	0	0	0	0	0	0	0	1	0	0	0	0	1	0	1	0	0	0	0	0
R_32	0	1	0	0	1	0	0	0	0	0	1	0	0	0	0	0	0	0	1	1	0	0	0	0	0	0	0	0	1	0	0	0	1	0	0	0	0	1	0	0	0	1	0	1	0	0	0	0	0
R_33	0	1	0	0	0	0	0	0	0	0	0	0	0	0	0	0	0	0	0	0	0	0	0	0	0	0	0	0	1	0	0	0	1	0	0	0	1	0	0	0	0	0	0	1	0	0	0	0	0
R_34	0	1	0	0	1	0	0	0	0	0	0	0	0	0	0	0	1	0	0	0	0	0	0	0	0	1	0	0	1	0	0	0	1	0	0	0	0	0	0	0	0	0	0	1	0	0	0	0	0
R_35	0	1	0	0	0	0	0	0	0	0	0	0	0	0	0	0	0	0	0	0	0	0	0	0	0	0	0	0	1	0	1	0	1	0	1	0	0	1	0	0	0	1	0	1	0	0	0	0	0
R_36	0	1	0	1	0	0	1	0	0	0	1	0	0	0	0	0	0	0	0	1	0	0	0	0	0	1	0	0	1	0	0	0	1	0	0	0	0	1	0	0	0	1	0	1	0	0	0	0	0
R_37	0	1	0	0	0	1	0	0	0	0	1	0	0	0	1	0	1	0	0	1	0	0	0	0	0	0	0	1	1	0	0	0	1	0	0	0	0	0	0	0	0	1	0	1	0	0	0	0	0
R_38	0	1	0	0	0	0	0	0	0	0	1	0	0	0	0	0	0	0	0	1	0	0	0	0	0	0	0	1	1	0	0	0	0	0	0	0	1	0	0	0	0	1	0	1	0	0	0	0	0
R_39	0	0	0	0	0	0	0	0	0	0	0	0	0	0	0	0	1	0	0	1	0	0	0	0	0	0	0	0	1	0	0	0	0	0	0	0	0	0	0	0	0	1	0	1	1	0	0	0	0
R_40	0	0	0	0	0	0	0	1	0	0	0	0	1	0	0	0	1	0	1	0	0	0	0	0	0	0	0	0	1	0	0	0	0	0	0	0	1	0	0	1	0	0	0	1	0	0	0	0	0
R_41	1	0	0	0	0	0	0	0	0	0	1	0	0	0	0	0	1	0	0	0	1	0	0	0	0	0	0	0	0	0	0	0	0	0	0	0	1	0	0	0	0	0	0	1	1	0	0	0	0
R_42	0	0	0	0	0	0	0	0	0	0	0	0	0	0	0	0	1	0	1	0	0	0	0	0	1	0	0	1	0	0	0	0	0	0	0	0	0	0	0	0	0	0	0	0	0	0	1	0	0
R_43	0	0	0	0	0	0	0	0	0	0	0	0	0	0	0	0	1	0	0	0	0	0	0	0	0	0	0	1	1	0	0	0	1	0	0	0	0	1	0	0	0	0	0	0	1	0	0	0	0
R_44	0	0	0	1	0	0	0	0	0	0	0	0	0	0	1	0	1	0	1	0	0	0	0	0	0	0	0	0	1	0	0	0	0	0	1	0	0	0	0	0	0	0	0	1	1	0	0	0	0
R_45	0	0	0	0	0	0	0	0	0	0	0	0	0	0	0	0	1	0	0	0	0	0	0	0	0	0	0	0	0	0	0	0	0	0	1	0	0	0	0	0	0	0	0	1	0	0	0	0	0
R_46	0	0	0	0	0	0	0	0	0	0	0	0	0	0	1	0	1	0	0	0	0	0	0	0	1	1	0	0	0	0	0	0	0	0	1	0	0	0	0	1	0	0	0	1	0	0	0	0	0
R_47	0	0	0	0	0	0	0	0	0	0	0	0	0	0	0	0	1	0	0	0	0	0	0	0	0	0	0	0	1	0	0	0	0	0	0	0	0	1	0	0	0	0	0	0	0	0	0	0	0
R_48	0	0	0	0	0	0	0	0	0	0	0	0	0	0	1	0	1	0	1	0	0	0	0	0	1	0	0	0	0	0	0	0	0	0	1	0	0	1	0	1	0	0	0	1	0	0	0	0	0
R_49	0	1	0	0	0	0	0	0	0	0	0	0	0	0	0	0	1	0	0	0	1	0	0	0	0	0	1	1	0	0	0	0	0	0	1	0	0	0	0	0	0	0	0	1	0	0	0	0	0
R_50	0	0	0	0	0	0	0	0	0	0	0	0	0	0	0	0	1	1	1	0	0	0	0	0	1	0	0	0	0	0	0	0	0	0	0	0	0	0	0	1	0	0	0	0	0	0	0	0	0
R_51	0	0	0	0	0	0	0	1	0	0	0	0	0	0	0	0	1	0	1	0	0	0	0	0	0	0	1	1	0	0	0	0	0	0	0	0	0	0	0	0	0	0	0	0	0	0	1	0	0
R_52	0	0	0	0	0	0	0	0	0	0	0	0	0	0	1	0	1	0	0	0	0	0	0	0	0	0	0	0	0	0	0	0	0	0	1	0	0	0	0	1	0	0	0	1	0	0	0	1	0
R_53	0	0	0	0	0	0	0	1	0	0	0	0	0	0	0	0	1	0	1	0	0	0	0	0	0	0	0	1	1	0	0	0	0	0	0	0	0	0	0	0	1	0	0	1	0	0	1	0	0
R_54	0	0	0	0	0	0	0	0	0	0	0	0	0	0	0	0	1	0	0	0	0	0	0	0	0	0	0	0	0	0	0	0	0	0	0	0	0	0	0	0	0	0	0	0	0	0	0	0	0
R_55	0	0	0	0	0	0	0	0	0	0	0	0	0	0	0	0	1	0	0	0	0	0	0	0	0	0	0	0	0	0	0	0	0	1	0	0	0	0	0	0	0	0	0	0	0	0	0	0	0
R_56	0	0	0	1	0	0	0	0	1	0	0	0	0	0	0	0	1	0	0	0	0	0	0	0	0	0	0	0	0	0	0	0	0	1	0	0	0	0	0	1	0	0	0	1	0	0	0	0	0
R_57	0	1	0	0	0	0	0	0	0	0	0	0	0	0	0	0	1	0	1	0	1	0	0	0	0	0	0	1	1	0	0	0	0	0	0	0	0	0	0	0	0	0	0	0	0	0	1	0	0
R_58	0	0	0	0	0	0	0	0	0	0	0	0	0	0	0	0	0	0	0	0	0	0	0	0	0	0	0	0	0	0	0	0	0	0	0	0	0	0	0	0	0	0	0	0	0	0	0	0	0
R_59	0	0	0	0	0	0	0	0	0	0	0	0	0	0	0	0	1	0	0	0	0	0	0	0	0	0	0	0	0	0	0	0	0	0	0	0	0	0	0	0	0	0	0	0	0	0	0	0	0
R_60	0	0	0	0	0	0	0	0	0	0	0	0	0	0	0	0	1	0	0	0	0	0	0	1	0	0	0	0	0	0	0	0	0	0	0	0	1	0	0	1	0	0	0	0	0	1	0	0	0
[truncated: 98 more columns]
